# Supplementary material for: Sulcal organization in the medial frontal cortex reveals insights into primate brain evolution
Source: bioRxiv or medRxiv preprint supplement (doi:10.1101/527374), 2019-01-31
Supplement: Supplementary file [file media-3.pdf]

## VERTICAL SULCI DESCRIPTION

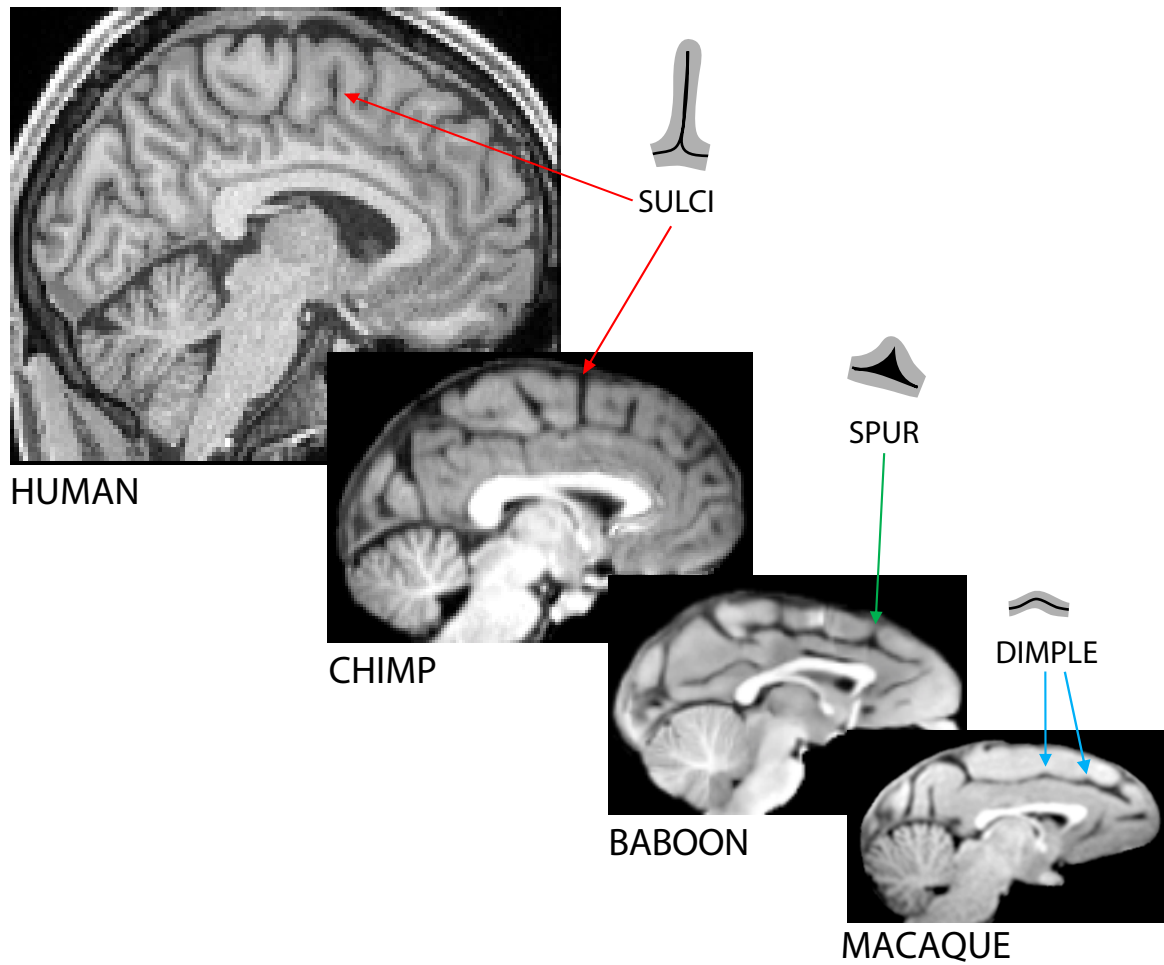

Figure S1. Description of the vertical sulci in the MCC. Vertical sulci are deep sulci in human and chimpanzee, spurs or dimples in baboons.
